# Supplementary material for: Ectopic transient overexpression of OCT-4 facilitates BMP4-induced osteogenic transdifferentiation of human umbilical vein endothelial cells
Source: PubMed Central journal article supplement — J Tissue Eng. 2020 Mar 7;11:2041731420909208. doi: 10.1177/2041731420909208 (PMC7066588; doi:10.1177/2041731420909208), 2020-03-07
Supplement: suppl_tables.pdf [file suppl_tables.pdf]

**Table S1.** Table showing results from gene set enrichment analysis (GSEA).

| Gene Set Name                                                                     | # Genes in<br>Gene set (K) | # Genes in<br>Overlap (k) | k/K    | p-value  | FDR<br>q-value |
|-----------------------------------------------------------------------------------|----------------------------|---------------------------|--------|----------|----------------|
| GO_CALCIUM_ION_BINDING                                                            | 697                        | 10                        | 0.0143 | 4.38E-08 | 5.56E-05       |
| HALLMARK_KRAS_SIGNALING_UP                                                        | 200                        | 6                         | 0.03   | 3.83E-07 | 3.53E-04       |
| GO_POSITIVE_REGULATION_OF_PATHWAY_<br>RESTRICTED_SMAD_PROTEIN_PHOSPHORYL<br>ATION | 48                         | 4                         | 0.0833 | 6.35E-07 | 3.54E-04       |
| GO_TRANSFORMING_GROWTH_FACTOR_B<br>ETA_RECEPTOR_BINDING                           | 50                         | 4                         | 0.08   | 7.51E-07 | 3.81E-04       |
| GO_SMAD_PROTEIN_SIGNAL_TRANSDUCTI<br>ON                                           | 56                         | 4                         | 0.0714 | 1.19E-06 | 4.58E-04       |
| GO_REGULATION_OF_PATHWAY_RESTRICTE<br>D_SMAD_PROTEIN_PHOSPHORYLATION              | 60                         | 4                         | 0.0667 | 1.57E-06 | 5.45E-04       |
| GO_REGULATION_OF_CELL_DIFFERENTIATI<br>ON                                         | 1492                       | 10                        | 0.0067 | 4.40E-07 | 8.38E-04       |

Gene set (K) means the total number of genes. Genes in overlap (k) means how many genes in the gene set that is also present in samples. False discovery rate (FDR) q-value represents rate of false positives in data.

**Table S2.** Table of information for elastic modulus.

|                       | Sample Group Name |
|-----------------------|-------------------|
|                       | G1H0.3            |
| Total solid (g/ml)    | 1.3               |
| Gelatin Type A (g/ml) | 1                 |
| Heparin (g/ml)        | 0.3               |
| Elastic modulus (Pa)  | 536±0.05177       |

Exact amount of gelatin, heparin and elastic modulus is shown.

**Table S3.** Table of primers used for PCR analysis.

| Target         | Primer  | Sequence                   |
|----------------|---------|----------------------------|
| <i>OCT-4</i>   | Forward | CGTGAAGCTGGAGGAGA          |
|                | Reverse | CATCGGCCTGTGTATATCCC       |
| <i>BMPRII</i>  | Forward | GCTAAAATTTGGCAGCAAGC       |
|                | Reverse | CTTGGGCCCTATGTGTCACT       |
| <i>BMPRIA</i>  | Forward | CAGGTTCTGGACTCAGCTC        |
|                | Reverse | CTTTCCTGGGTGCCATAAA        |
| <i>SLUG</i>    | Forward | GCACTGCGATGCCAGTCTA        |
|                | Reverse | TGGCGCAGATCTTGCAAACA       |
| <i>SNAIL</i>   | Forward | GGCAATTTAACAATGTCTGAAAAGG  |
|                | Reverse | GAATAGTTCTGGGAGACACATCG    |
| <i>VEGFR-2</i> | Forward | GGACTTCCAGGGAGGAAATAAA     |
|                | Reverse | CGCTTGGATAACAAGGGTACT      |
| <i>CD31</i>    | Forward | AAATGCTCTCCAGCCAGCAT       |
|                | Reverse | GCAACACACTGGTATTTCGACGTCTT |
| <i>VCAM1</i>   | Forward | GATTGGTGACTCCGTCTCATT      |
|                | Reverse | CCTTCCCATTTCAGTCGACTATC    |
| <i>CBFA1</i>   | Forward | TGAGCTCCGGAATGCCTCTG       |
|                | Reverse | TGTCTGTGCCTTCTGGGTCC       |
| <i>ALP</i>     | Forward | GCTGGTGGAAGGAGGCAGAA       |
|                | Reverse | GTGGGAATGGTCCGCAGTGA       |
| <i>COL I</i>   | Forward | GTCACCCACCGACCAAGAAACC     |
|                | Reverse | AAGTCCAGGCTGTCCAGGGATG     |

Primer sequences used in PCR experiments are listed.
